# Supplementary material
Source: PubMed Central journal article supplement (PMC5655099)
Supplement: AAC.00311-17_zac011176615s1.pdf [file AAC.00311-17_zac011176615s1.pdf]

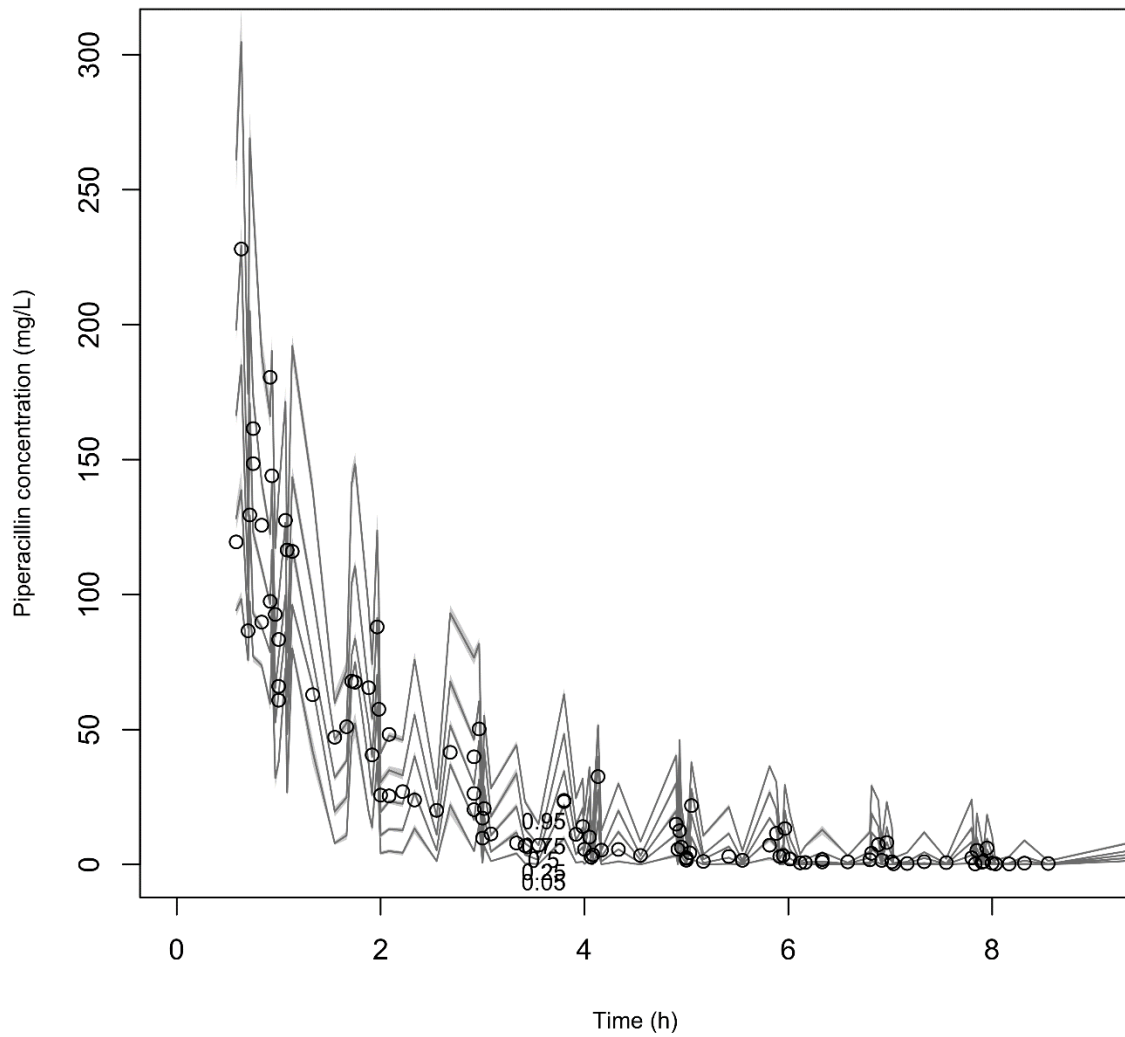

Figure S1. Visual predictive check plot. Concentration data is presented in mg/L, shaded area represents 95% confidence interval at each quantile.

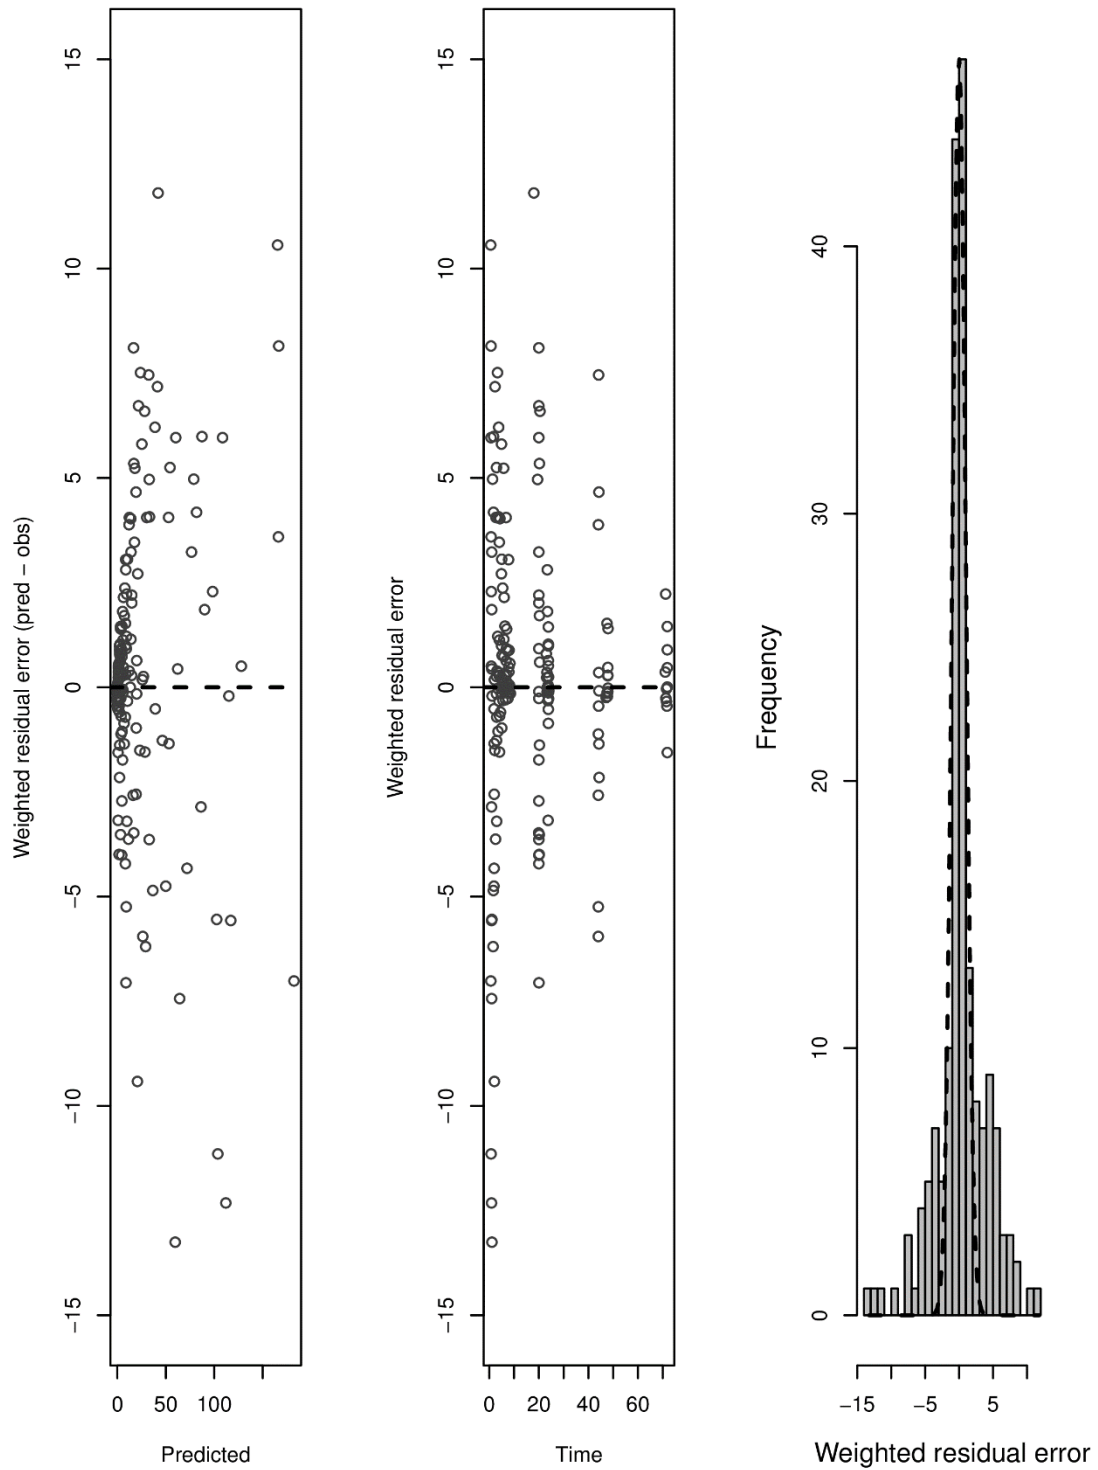

Figure S2. A plot of weighted residual error (population predicted concentrations – observed concentration, mg/L) versus population predictions (left) and time of observation (middle); and frequency distribution of the weighted residual errors (right).

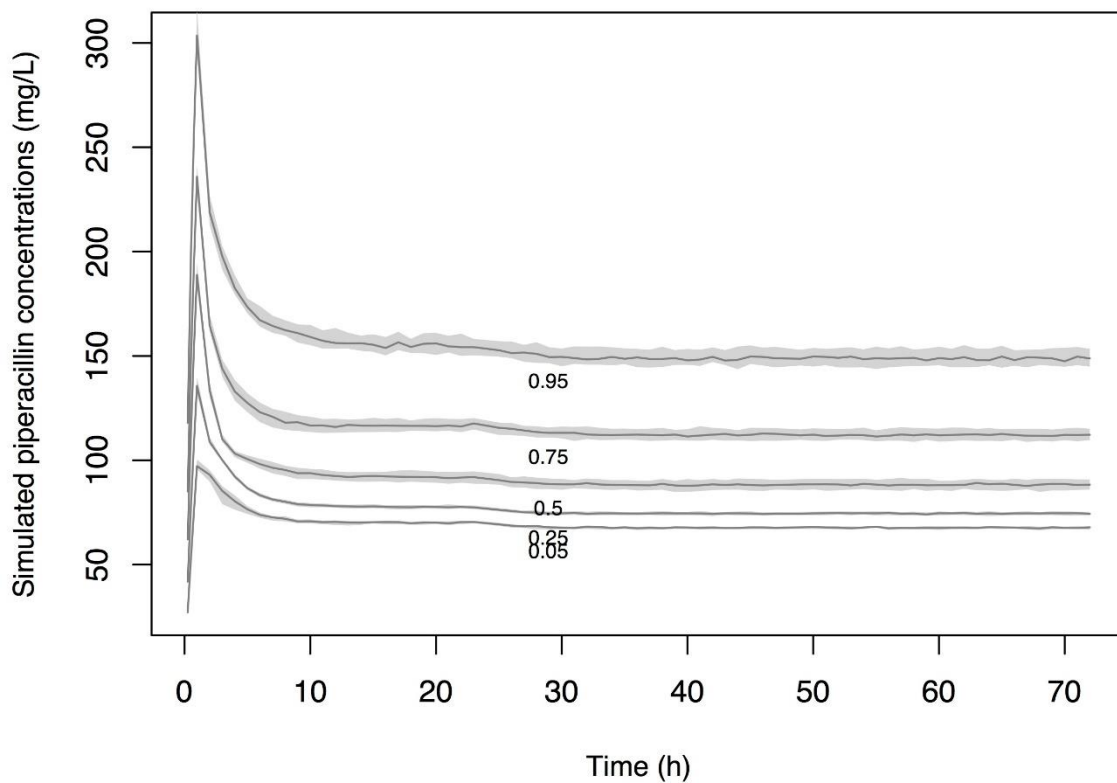

Figure S3. The concentration-time profile of piperacillin for simulated dosing regimen of 4.0 g loading dose plus 16g continuous infusion for a creatinine clearance of 40 mL/min/1.73m<sup>2</sup>. 0.95, 95<sup>th</sup> percentile; 0.75, 75<sup>th</sup> percentile; 0.5, 50<sup>th</sup> percentile; 0.25, 25<sup>th</sup> percentile; 0.05, 5<sup>th</sup> percentile. Shaded area represents the 95 % confidence interval .
